1 **Severe acute respiratory syndrome coronavirus 2 breakthrough infections in healthcare**  
2 **workers vaccinees with BNT162b2 (Pfizer-BioNtech) in Bogotá, Colombia**

3 Pilar Tavera-Rodríguez<sup>a†</sup>, Juliana Barbosa-Ramírez<sup>a†</sup>, Andrea Bermúdez-Forero<sup>a†</sup>, Diego Prada-  
4 Cardozo<sup>b</sup>, Jhonnatan Reales-González<sup>b</sup>, Dioselina Peláez-Carvajal<sup>b</sup>, Diana Malo-Sanchez<sup>c</sup>, Maria-  
5 Ximena Meneses-Gil<sup>a</sup>, Marcela Mercado-Reyes<sup>a</sup>.

6 <sup>a</sup> Dirección de Investigación en Salud Pública. Instituto Nacional de Salud, Bogotá 111321, Colombia.

7 <sup>b</sup> Grupo de Genómica de Microorganismos Emergentes. Dirección de Investigación en Salud Pública,  
8 Instituto Nacional de Salud, Bogotá 111321, Colombia.

9 <sup>c</sup> Dirección de Vigilancia y Control en Salud Pública. Instituto Nacional de Salud, Bogotá 111321,  
10 Colombia.

11 <sup>†</sup> These authors contributed equally

12  
13 **Corresponding author:** Pilar Tavera-Rodríguez. Email: [ptavera@ins.gov.co](mailto:ptavera@ins.gov.co); Tel.: (+57)  
14 3133548215; Department of Public Health Research, Instituto Nacional de Salud, Av. Calle 26 No  
15 51-20, Bogotá 111321, Colombia.

16  
17 **Abstract**

18 The healthcare workers are considered as a high-risk group for infection with SARS-CoV-2, so  
19 they were included in the first stage of the National Plan for Vaccination against COVID-19 in  
20 Colombia.

21 An ongoing prospective cohort study to evaluate immune response to vaccination included 490  
22 workers from health institutions in Bogotá, Colombia, vaccinated between March and June 2021  
23 with BNT162b2 (Pfizer-BioNtech). Multiple samples were collected during a follow-up period of  
24 6 months after immunization. We report cases of asymptomatic and symptomatic SARS-CoV-2

25 infections detected in this cohort. For each participant demographic data, vaccination dates, results  
26 for SARS-CoV-2 RT-PCR, and detection of antibody (IgG) tests during the follow-up period were  
27 collected.

28 SARS-CoV-2 infection was detected in 38 (7.7 %) volunteers. Of these, 81.6% had a positive RT-  
29 PCR for SARS-CoV-2, and 18.4% were confirmed by detection of IgG anti-SARS-CoV-2  
30 nucleoprotein; 76.3% of infections occurred after 7 days of second dose. A total of 57.9% of the  
31 cases were asymptomatic. No hospitalizations or deaths were registered. When infection occurred,  
32 81.6% of infected participants had presence of IgG anti-S antibodies. In 12 samples in which  
33 genomic characterization was achieved, 83.4% corresponded to the variant Mu, 8.3% Gamma, and  
34 8.3% Delta.

35 All findings agree with other reports in different studies that show the benefit of COVID-19  
36 vaccines, protecting specially against severe disease but not against infection or re-infection.

37 **Keywords:** SARS-CoV-2 infection, health personnel, BNT162b2 vaccine.

38

## 39 **Background**

40 In Colombia the National Plan for Vaccination against coronavirus disease 2019 (COVID-19)  
41 started on February 17 2021, with healthcare workers because of the high risk of exposure, using  
42 the BNT162b2 COVID-19 vaccine manufactured by Pfizer and BioNTech; healthcare workers at  
43 every level and service were included [1]. There are multiple reports about BNT162b2 vaccine  
44 efficacy in preventing symptomatic severe acute respiratory syndrome coronavirus 2 (SARS-CoV-  
45 2) infections, complications due to infection, and deaths with values above 85% and 90% for  
46 symptomatic infection and deaths, respectively [2 - 5]. However, vaccinated individuals are still at  
47 risk of infection.

48

## 49 **Objectives**

50 To report SARS-CoV-2 cases with asymptomatic and symptomatic infections in a cohort of  
51 healthcare workers detected during 6–9 months of follow-up after vaccination with BNT162b2.

52

## 53 **Study design**

54 An ongoing prospective cohort study to evaluate the humoral immune response to vaccination  
55 included 490 workers from health institutions in Bogotá, Colombia, vaccinated between March and  
56 June 2021 with BNT162b2 (Pfizer-BioNTech). Five follow-ups were carried out in 6 months  
57 (baseline 0–3 days before vaccination, day 21, 60, 90, and 210 after the first dose) and included the  
58 collection of blood samples and a nasopharyngeal swab from participants. Additional follow-up  
59 was performed on volunteers who reported symptoms compatible with COVID-19 or close contact  
60 with confirmed cases until 9 months after vaccination.

61 This study presents information on cases of SARS-CoV-2 infection detected in the cohort. In  
62 addition, for each participant, demographic data, vaccination dates, results for SARS-CoV-2  
63 reverse transcription-polymerase chain reaction (RT-PCR), and detection of antibody  
64 (immunoglobulin G [IgG]) tests were collected. The study was approved by the National Health  
65 Institute Ethics Committee (CEMIN-4-2021), and all participants signed the informed consent.

66 Anti-S1 IgG was quantified using a SARS-CoV-2 IgG sCOVG chemiluminescence immunoassay  
67 (ADVIA Centaur XPT platform, Siemens). In addition, anti-SARS-CoV-2 nucleocapsid IgG  
68 presence were determined using the ID Screen®SARS-CoV-2-N indirect enzyme-linked  
69 immunosorbent assay (ID Vet).

70 SARS-CoV-2 was detected in nasopharyngeal swabs using real-time RT-PCR to detect the viral E  
71 gene [6]. Positive samples by RT-PCR with a cycle threshold (CT) <25 were included in  
72 sequencing [7], assembly of raw data [8], and lineage assignment [9].

73 **Results**

74 SARS-CoV-2 infection was detected in 38 (7.7 %) participants during the follow-up period, with  
75 a median age of 40 years (range 26–62); 65.8% (25/38) of them were women. Administrative and  
76 laboratory staff had the same frequency (32%), followed by field epidemiologists (29%) and  
77 general service staff (8%).

78 The 78.9% (30/38) of positive cases occurred between May and July 2021; therefore, cases of  
79 COVID-19 in healthcare workers described here occurred during the third peak of the disease in  
80 Colombia (Figure 1).

81

82 **Figure 1. Control graph incidence of confirmed SARS-CoV-2 cases, 2021\***

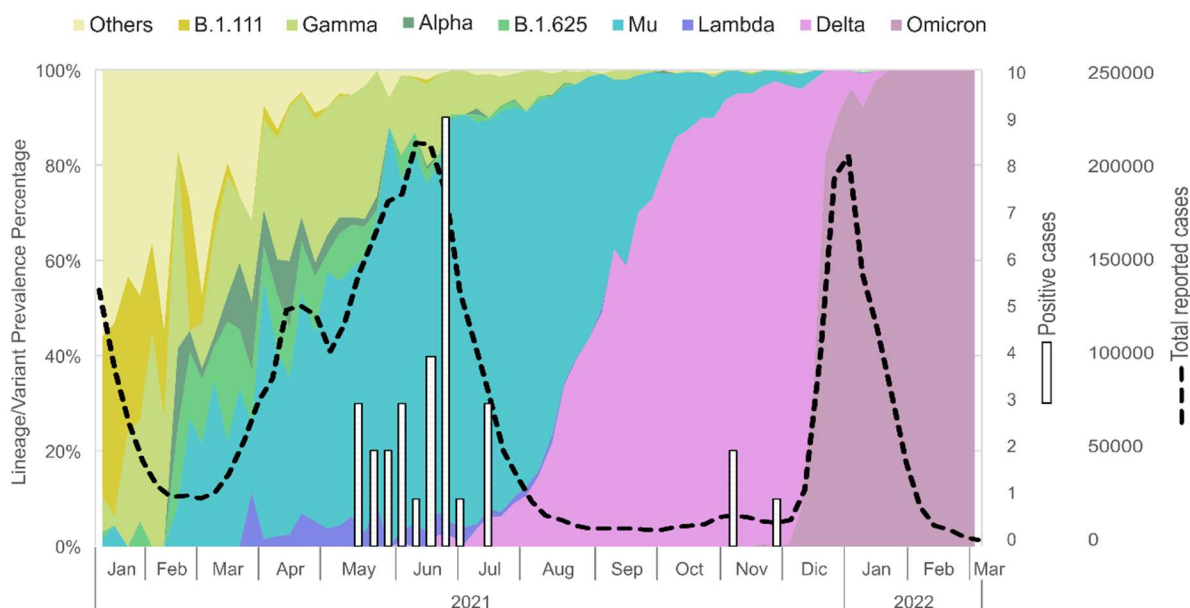

83

84 \* Cases shown corresponds to those confirmed by RT-PCR because cases confirmed by serology do not have a  
85 specific date of infection or symptoms onset.

86

87 A total of 22 out of 38 were asymptomatic. Between the remaining 16 cases, the most frequent  
88 symptoms were adynamia (62.5%), headache (43.8%), and fever (37.5%) (Table 1). No  
89 hospitalizations or deaths were register.

90 A total of 81.6% of the cases (31/38) had a positive RT-PCR for SARS-CoV-2. Of these, 9.7%  
91 (3/31) were detected on the same day as the first dose of the vaccine, 16.1% (5/31) between the  
92 first and second doses, and 74.2% (23/31) more than 1 week after the second dose. The remaining  
93 seven confirmed cases (18.4%) were positive for anti-nucleoprotein IgG in the serological test.  
94 Most of them (6/7) were positive after the second dose of the vaccine.

95 Most cases (81.6%) had IgG anti-S antibodies with values between 56 and 1600 BAU/mL when  
96 the infection occurred. The other cases (18.4%) were negative for IgG anti-S antibodies in the  
97 sample collected prior to infection confirmation; however, most of these samples were collected  
98 between days 0–21 after the first dose of vaccine (Table 2).

99 Genomic characterization was achieved in 38.7% (12/31) of the RT-PCR-positive samples, of  
100 which 83.4% (10/12) corresponded to the variant Mu, 8.3% (1/12) Gamma, and 8.3% (1/12) Delta  
101 (Table 1).

102

## 103 **Discussion**

104 Within a group of 490 healthcare workers vaccinated against COVID-19 with BNT162b2, 38 cases  
105 of SARS-CoV-2 infection were identified, of which 76.3% (29/38) occurred 7 days after the second  
106 dose and the time when full efficacy against the disease was reached [2] [10-11]. These results are  
107 consistent with previous reports on the high effectiveness of the BNT162b2 vaccine in preventing  
108 severe disease and deaths [10 - 12] but lower effectiveness against infection with the virus [4,5, 11,  
109 13, 14].

110 Similar to other reports [13-14], more than 50% of the cases detected were asymptomatic, with  
111 no severe cases in infected volunteers.

112 Cases 4 and 19 correspond to people with a previous infection, detected by RT-PCR 6 and 14  
113 months before detection of re-infection during this follow-up.

114 The Colombian third pandemic wave lasted from weeks 10 to 35 (2021), and June had the highest  
115 number of cases nationwide in 2021; hence, most cases described concur with this third pandemic  
116 peak. During this third peak, genomic surveillance showed that the most frequent variant was Mu  
117 (52.7%), followed by the Gamma and lineages (P.1, P.1.1, and P.1.2 with 23.3%) [3]. The viruses  
118 sequenced from the cases described herein concur with the predominance of the Mu variant during  
119 the third peak (Figure 1), being the variant identified in 83.4% of the samples sequenced.

120 Additionally, the last case detected in December 2021 corresponds to the Delta variant, which  
121 started circulating in Colombia in August 2021 [15].

122 Finally, detection of infection was also possible through anti-N IgG serological tests in seven cases  
123 of post-vaccination infection. When the target of the vaccine is the S protein of SARS-CoV-2, the  
124 detection of antibodies against a different target, such as nucleoprotein (N), can be used to help  
125 differentiate natural infection from vaccination [16-17]. Of these seven people, only one reported  
126 having mild respiratory symptoms, while the other six never realized that they had been infected.

127 This dataset was obtained from a well-characterized group of healthcare workers participating in a  
128 prospective cohort study that included scheduled follow-ups for collection of respiratory and blood  
129 samples and the self-report of clinical symptoms or close contact with confirmed cases of COVID-  
130 19. This allows for a very good approach to the assessment of asymptomatic infections.

131 All findings agree with other reports in different studies that show the benefit of COVID-19  
132 vaccines, especially against severe diseases but not against infection or re-infection.

133

134 Acknowledgement: The authors thank Dr. Jaime Castellanos for his review and comments, and  
135 Hector Ruiz for the figure desing.

136 Funding: This research was funded by Instituto Nacional de Salud-Colombia, project code  
137 CEMIN-04-2021.

138 Conflict of Interest: The authors declare no conflict of interest.

139 Ethical Approval statement: Informed consent was obtained from all subjects involved in the study.

140

## 141 **References**

142 [1] Ministerio de Salud y Protección Social, Departamento Nacional de Planeación, Ministerio  
143 de Hacienda y Crédito Público, Instituto de Evaluación Tecnológica en Salud. Plan nacional de  
144 vacunación contra el COVID-19. Documento técnico versión 2. [Internet]. [Accessed: January 19  
145 2022]. Available from:

146 <https://www.minsalud.gov.co/sites/rid/Lists/BibliotecaDigital/RIDE/VS/pnv-contra-covid-19.pdf>.

147 [2] Polack FP, Thomas SJ, Kitchin N, Absalon J, Gurtman A, Lockhart S, et al. Safety and  
148 Efficacy of the BNT162b2 mRNA Covid-19 Vaccine. N Engl J Med. December 31  
149 2020;383(27):2603-15. doi:10.1056/NEJMoa2034577.

150 [3] Instituto Nacional de Salud. Estrategia de caracterización genómica por muestreo  
151 probabilístico para SARS-CoV-2 en Colombia: Primer muestreo. [Internet]. Available from:  
152 [http://www.ins.gov.co/BibliotecaDigital/Estrategia-caracterizacion-genomica-muestreo-](http://www.ins.gov.co/BibliotecaDigital/Estrategia-caracterizacion-genomica-muestreo-probabilistico-SARS-CoV-2-Primer-muestreo.pdf)  
153 [probabilistico-SARS-CoV-2-Primer-muestreo.pdf](http://www.ins.gov.co/BibliotecaDigital/Estrategia-caracterizacion-genomica-muestreo-probabilistico-SARS-CoV-2-Primer-muestreo.pdf).

154 [4] Hall VJ, Foulkes S, Saei A, Andrews N, Oguti B, Charlett A, et al. COVID-19 vaccine  
155 coverage in health-care workers in England and effectiveness of BNT162b2 mRNA vaccine against  
156 infection (SIREN): a prospective, multicentre, cohort study. Lancet Lond Engl. May 8  
157 2021;397(10286):1725-35. doi: 10.1016/S0140-6736(21)00790-X.

- 158 [5] Zacay G, Shasha D, Bareket R, Kadim I, Hershkowitz Sikron F, Tsamir J, et al. BNT162b2  
159 Vaccine Effectiveness in Preventing Asymptomatic Infection With SARS-CoV-2 Virus: A  
160 Nationwide Historical Cohort Study. *Open Forum Infect Dis*. June 1 2021;8(6): ofab262. doi:  
161 0.1093/ofid/ofab262.
- 162 [6] Corman VM, Landt O, Kaiser M, Molenkamp R, Meijer A, Chu DK, et al. Detection of  
163 2019 novel coronavirus (2019-nCoV) by real-time RT-PCR. *Eurosurveillance* [Internet]. 23 de  
164 enero de 2020 [Accessed February 21 2022];25(3). Available from:  
165 <https://www.eurosurveillance.org/content/10.2807/1560-7917.ES.2020.25.3.2000045>.
- 166 [7] Quick J. nCoV-2019 sequencing protocol v3 (LoCost) [Internet]. protocols.io. 2020  
167 [Accessed April 8 2022]. Available from: [https://www.protocols.io/view/ncov-2019-sequencing-  
168 protocol-v3-locost-bh42j8ye](https://www.protocols.io/view/ncov-2019-sequencing-protocol-v3-locost-bh42j8ye).
- 169 [8] Loman N, Rowe W, Rambaut A. nCoV-2019 novel coronavirus bioinformatics protocol.  
170 [Internet]. [Accessed April 8 2022]. Available from: [https://artic.network/ncov-2019/  
171 bioinformatics-sop.html](https://artic.network/ncov-2019/ncov2019-bioinformatics-sop.html).
- 172 [9] GitHub - cov-lineages/pangolin: Software package for assigning SARS-CoV-2 genome  
173 sequences to global lineages. [Internet]. [Accessed: April 8 2022]. Available:  
174 <https://github.com/cov-lineages/pangolin>.
- 175 [10] Thomas SJ, Moreira ED, Kitchin N, Absalon J, Gurtman A, Lockhart S, et al. Safety and  
176 Efficacy of the BNT162b2 mRNA Covid-19 Vaccine through 6 Months. *N Engl J Med*. November  
177 4 2021;385(19):1761-73. Doi: 10.1056/NEJMoa2110345.
- 178 [11] International Vaccine Access Center, Johns Hopkins Bloomberg School of Public Health,  
179 World Health Organization. Results of COVID-19 Vaccine Effectiveness Studies: An Ongoing  
180 Systematic Review. Forest Plots Updated October 21, 2021. [Internet]. Available from:



181 <https://view-hub.org/sites/default/files/2021->

182 [10/COVID19%20VE%20Studies\\_Forest%20Plots\\_1.pdf](https://view-hub.org/sites/default/files/2021-10/COVID19%20VE%20Studies_Forest%20Plots_1.pdf).

183 [12] Haas EJ, Angulo FJ, McLaughlin JM, Anis E, Singer SR, Khan F, et al. Impact and  
184 effectiveness of mRNA BNT162b2 vaccine against SARS-CoV-2 infections and COVID-19 cases,  
185 hospitalizations, and deaths following a nationwide vaccination campaign in Israel: an  
186 observational study using national surveillance data. *The Lancet*. May 2021;397(10287):1819-29.  
187 doi: 10.1016/S0140-6736(21)00947-8.

188 [13] Tang L, Hijano DR, Gaur AH, Geiger TL, Neufeld EJ, Hoffman JM, et al. Asymptomatic  
189 and Symptomatic SARS-CoV-2 Infections After BNT162b2 Vaccination in a Routinely Screened  
190 Workforce. *JAMA*. June 22 2021;325(24):2500-2502. doi: 10.1001/jama.2021.6564.

191 [14] Angel Y, Spitzer A, Henig O, Saiag E, Sprecher E, Padova H, et al. Association Between  
192 Vaccination With BNT162b2 and Incidence of Symptomatic and Asymptomatic SARS-CoV-2  
193 Infections Among Health Care Workers. *JAMA*. June 22 2021;325(24):2457-65. doi:  
194 10.1001/jama.2021.7152.

195 [15] Ministerio de Salud y Protección Social. Variante Delta ya es dominante en todo el país  
196 [Internet]. [Accessed February 21 2022]. Available from:  
197 <https://www.minsalud.gov.co/Paginas/Variante-Delta-ya-es-dominante-en-todo-el-pais.aspx>.

198 [16] CDC. Interim Guidelines for COVID-19 Antibody Testing [Internet]. Centers for Disease  
199 Control and Prevention. 2020 [Accessed February 21 2022]. Available from:  
200 <https://www.cdc.gov/coronavirus/2019-ncov/lab/resources/antibody-tests-guidelines.html>.

201 [17] World Health Organization. Interim recommendations for use of the Pfizer–BioNTech  
202 COVID-19 vaccine, BNT162b2, under Emergency Use Listing [Internet]. [Accessed February 28  
203 2022]. Available from: [https://www.who.int/publications-detail-redirect/WHO-2019-nCoV-](https://www.who.int/publications-detail-redirect/WHO-2019-nCoV-vaccines-SAGE_recommendation-BNT162b2-2021.1)  
204 [vaccines-SAGE\\_recommendation-BNT162b2-2021.1](https://www.who.int/publications-detail-redirect/WHO-2019-nCoV-vaccines-SAGE_recommendation-BNT162b2-2021.1).

205

**Table 1. Information for cases of SARS-CoV-2 infection confirmed by RT-PCR**

206

| Case | Sex / Age range | Occupation / activity | Date of positive result (Epi week - year) | Days after 1st dose | Symptoms                                                        | Variant / Lineage | Anti-S IgG (BAU/ml) <sup>§</sup> |
|------|-----------------|-----------------------|-------------------------------------------|---------------------|-----------------------------------------------------------------|-------------------|----------------------------------|
| 1    | F/<br>25-34     | Field epidemiology    | 21 - 2021                                 | 78                  | Cough, runny nose, fever, headache, adynamia, ageusia           | Mu (B.1.621)      | >2180                            |
| 2    | F/<br>25-34     | Field epidemiology    | 20 - 2021                                 | 74                  | Asymptomatic                                                    | Gamma (P.1)       | >2180                            |
| 3    | M/<br>35-44     | Laboratory            | 19 - 2021                                 | 0                   | Asymptomatic                                                    | Mu (B.1.621)      | No Reactive                      |
| 4    | M/<br>45-54     | General services      | 19 - 2021                                 | 0                   | Asymptomatic                                                    | Mu (B.1.621)      | 288.9                            |
| 5    | F/<br>45-54     | General services      | 19 - 2021                                 | 0                   | Fever, adynamia, myalgia                                        | NS                | No Reactive                      |
| 6    | F/<br>35-44     | Laboratory            | 22 - 2021                                 | 34                  | Asymptomatic                                                    | NS                | 670.6                            |
| 7    | F/<br>35-44     | Administrative        | 22 - 2021                                 | 20                  | Asymptomatic                                                    | NS                | 93.1                             |
| 8    | F/<br>25-34     | Administrative        | 22 - 2021                                 | 20                  | Headache, adynamia, anosmia, ageusia                            | Mu (B.1.621)      | 56.7                             |
| 9    | F/<br>25-34     | Laboratory            | 23 - 2021                                 | 95                  | Asymptomatic                                                    | NS                | 570.7                            |
| 10   | M/<br>45-54     | Administrative        | 20 - 2021                                 | 8                   | Asymptomatic                                                    | NS                | No Reactive                      |
| 11   | M/<br>35-44     | Laboratory            | 21 - 2021                                 | 14                  | Headache, adynamia, fever, arthralgia, eye pain, cough, fatigue | NS                | No Reactive                      |
| 12   | M/<br>45-54     | Laboratory            | 24 - 2021                                 | 32                  | Asymptomatic                                                    | Mu (B.1.621)      | No Reactive                      |
| 13   | F/<br>45-54     | Administrative        | 24 - 2021                                 | 10                  | Headache, adynamia, anosmia                                     | NS                | No Reactive                      |
| 14   | M/<br>55-64     | Administrative        | 24 - 2021                                 | 35                  | Fever, sore throat                                              | Mu (B.1.621)      | >2180                            |
| 15   | F/<br>35-44     | Laboratory            | 24 - 2021                                 | 103                 | Asymptomatic                                                    | NS                | 2775,1                           |
| 16   | F/<br>35-44     | Administrative        | 25 - 2021                                 | 72                  | Asymptomatic                                                    | Mu (B.1.621)      | >2180                            |
| 17   | F/<br>35-44     | Laboratory            | 25 - 2021                                 | 40                  | Asymptomatic                                                    | Mu (B.1.621)      | 222.1                            |
| 18   | M/<br>45-54     | Administrative        | 25 - 2021                                 | 41                  | Adynamia, runny nose, coryza, myalgia                           | NS                | 87.2                             |

|    |             |                    |           |     |                                                                                                                     |                |        |
|----|-------------|--------------------|-----------|-----|---------------------------------------------------------------------------------------------------------------------|----------------|--------|
| 19 | F/<br>35-44 | Field epidemiology | 25 - 2021 | 111 | Runny nose                                                                                                          | NS             | >2180  |
| 20 | F/<br>55-64 | Laboratory         | 25 - 2021 | 111 | Asymptomatic                                                                                                        | NS             | 939.1  |
| 21 | F/<br>25-34 | Field epidemiology | 25 - 2021 | 111 | Asymptomatic                                                                                                        | NS             | 1912.3 |
| 22 | M/<br>25-34 | Field epidemiology | 25 - 2021 | 110 | Fever, cough, sore throat, adynamia, headache, anosmia, ageusia, arthralgia, runny nose, chest pain, conjunctivitis | Mu (B.1.621)   | >2180  |
| 23 | F/<br>25-34 | Laboratory         | 26 - 2021 | 79  | Diarrhea, adynamia, cough                                                                                           | NS             | >2180  |
| 24 | F/<br>35-44 | Field epidemiology | 25 - 2021 | 106 | Headache                                                                                                            | NS             | >2180  |
| 25 | M/<br>45-54 | Administrative     | 28 - 2021 | 61  | Asymptomatic                                                                                                        | Mu (B.1.621)   | 93.3   |
| 26 | F/<br>25-34 | Laboratory         | 28 - 2021 | 62  | Fever, sore throat, respiratory distress, adynamia                                                                  | NS             | >2180  |
| 27 | F/<br>35-44 | Field epidemiology | 28 - 2021 | 132 | Anosmia, ageusia, nasal congestión                                                                                  | NS             | 303.5  |
| 28 | F/<br>25-34 | Field epidemiology | 25 - 2021 | 109 | Anosmia                                                                                                             | NS             | >2180  |
| 29 | F/<br>35-44 | Field epidemiology | 45 - 2021 | 249 | Asymptomatic                                                                                                        | NS             | 88.1   |
| 30 | M/<br>35-44 | Field epidemiology | 45 - 2021 | 249 | Asymptomatic                                                                                                        | NS             | 258.3  |
| 31 | M/<br>25-34 | Field epidemiology | 48 - 2021 | 269 | Cough, sore throat, adynamia                                                                                        | Delta (AY.122) | 196.9  |

207  
 208 § Anti-S IgG reported corresponds to the sample collected prior to date of the positive RT-PCR. Results are expressed as binding  
 209 antibody units (BAU)/mL. Values  $\geq 21.8$  BAU/ml are positive.

210 NS: Failed to sequencing (sequences with coverage less than 70% for lineage assignment by the Pangolin algorithm).

211

212

213

214

215

216

217

218

219 **Table 2. Information for cases of SARS-CoV-2 infection confirmed by detection of IgG anti-**  
220 **Nucleoprotein**

| Case | Sex / Age   | Occupation / activity | Date of positive result (Epi week - year) | Days after 1st dose* | Symptoms             | Anti-S IgG (BAU/ml) <sup>§</sup> |
|------|-------------|-----------------------|-------------------------------------------|----------------------|----------------------|----------------------------------|
| 32   | F/<br>35-44 | Laboratory            | 40 - 2021                                 | > 90                 | Asymptomatic         | >2180                            |
| 33   | F/<br>55-64 | Laboratory            | 17 - 2021                                 | 0-21                 | Asymptomatic         | No Reactive                      |
| 34   | F/<br>35-44 | Administrative        | 28 - 2021                                 | 21-60                | Asymptomatic         | 1317.8                           |
| 35   | M/<br>55-64 | Administrative        | 32 - 2021                                 | 60-90                | Asymptomatic         | 1694.1                           |
| 36   | M/<br>45-54 | General services      | 35 - 2021                                 | 60-90                | Asymptomatic         | >2180                            |
| 37   | F/<br>35-44 | Administrative        | 48 - 2021                                 | > 90                 | Headache, runny nose | >2180                            |
| 38   | F/<br>55-64 | Administrative        | 47 - 2021                                 | > 90                 | Asymptomatic         | >2180                            |

221  
222 \* Days after 1st dose are approximated according to collection date of the positive sample for IgG anti-N  
223 § Anti-S IgG reported corresponds to the sample collected prior to date of the positive RT-PCR. Results are expressed as binding  
224 antibody units (BAU)/mL. Values  $\geq 21.8$  BAU/ml are positive.
